# Supplementary figures and images for: GW182 proteins cause PABP dissociation from silenced miRNA targets in the absence of deadenylation
Source: PubMed Central journal article supplement — EMBO J. 2013 Mar 5;32(7):1052–65. doi: 10.1038/emboj.2013.44 (PMC3616289; doi:10.1038/emboj.2013.44), 2013-03-05

**Zekri et al.**  
**Figure 1**

Figure 1 F

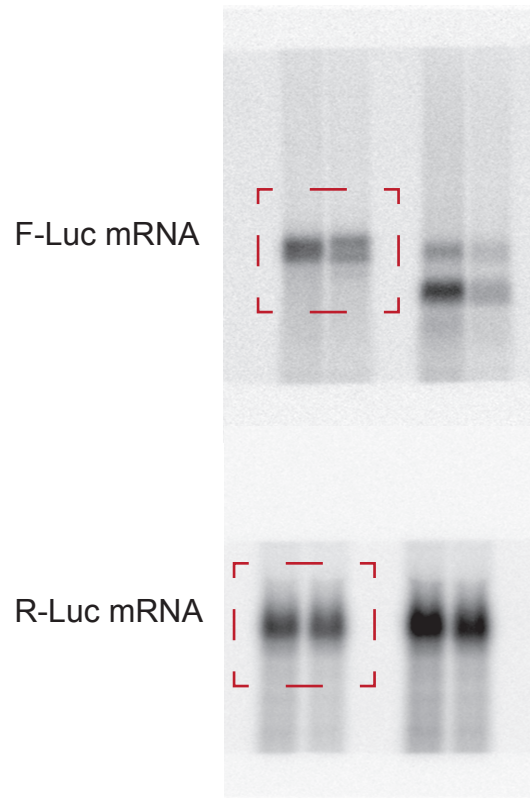

Supplement: emboj201344df1.pdf [file emboj201344df1.pdf]

**Zekri et al.**  
**Figure 2**

Figure 2 B

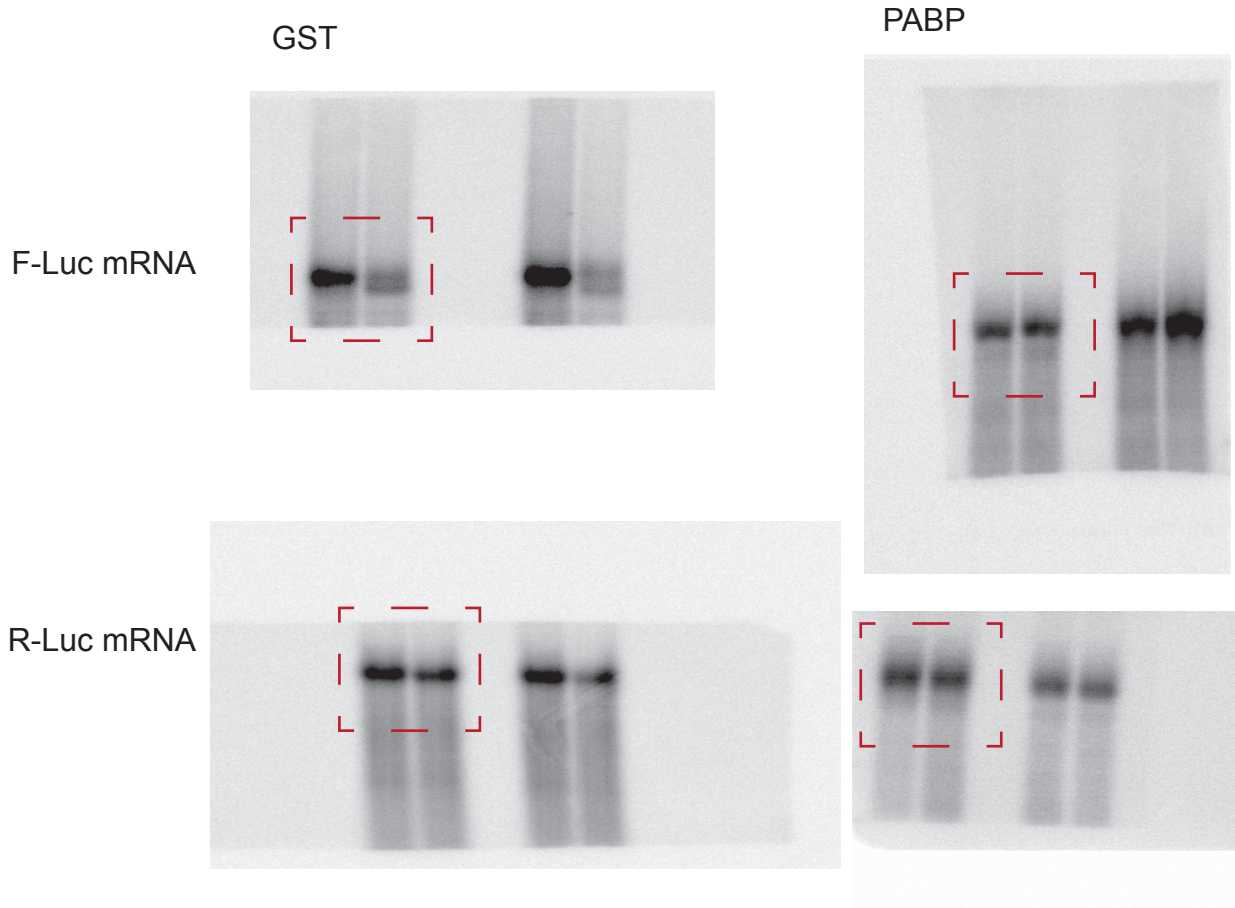

Supplement: emboj201344df2.pdf [file emboj201344df2.pdf]

**Zekri et al.**  
**Figure 3**

Figure 3 B

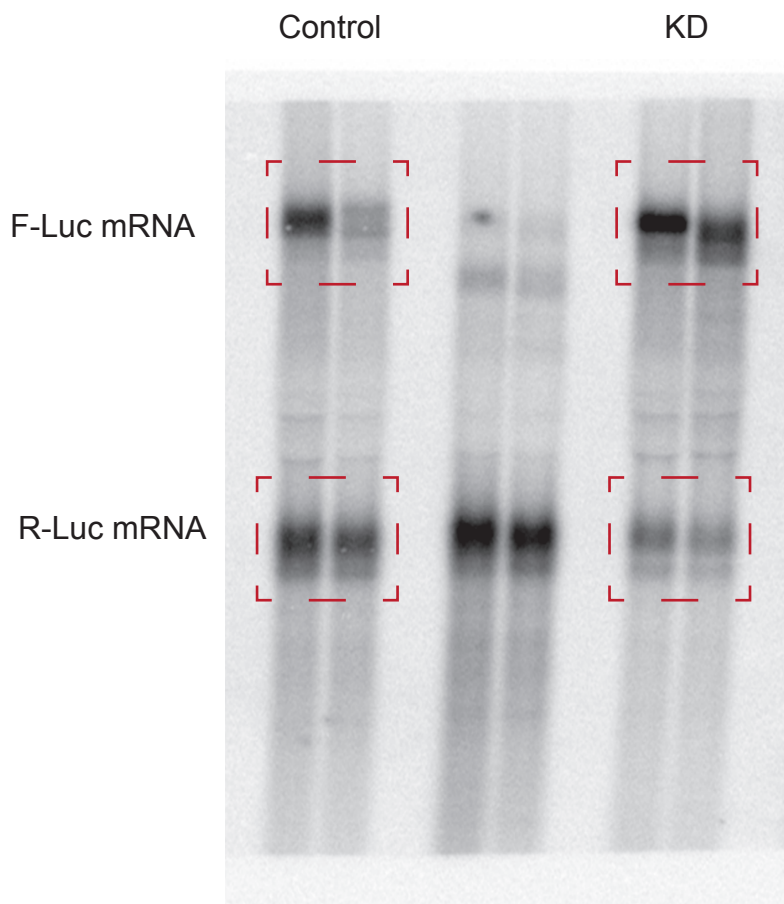

Supplement: emboj201344df3.pdf [file emboj201344df3.pdf]

**Zekri et al.  
Figure 4**

Figure 4 B

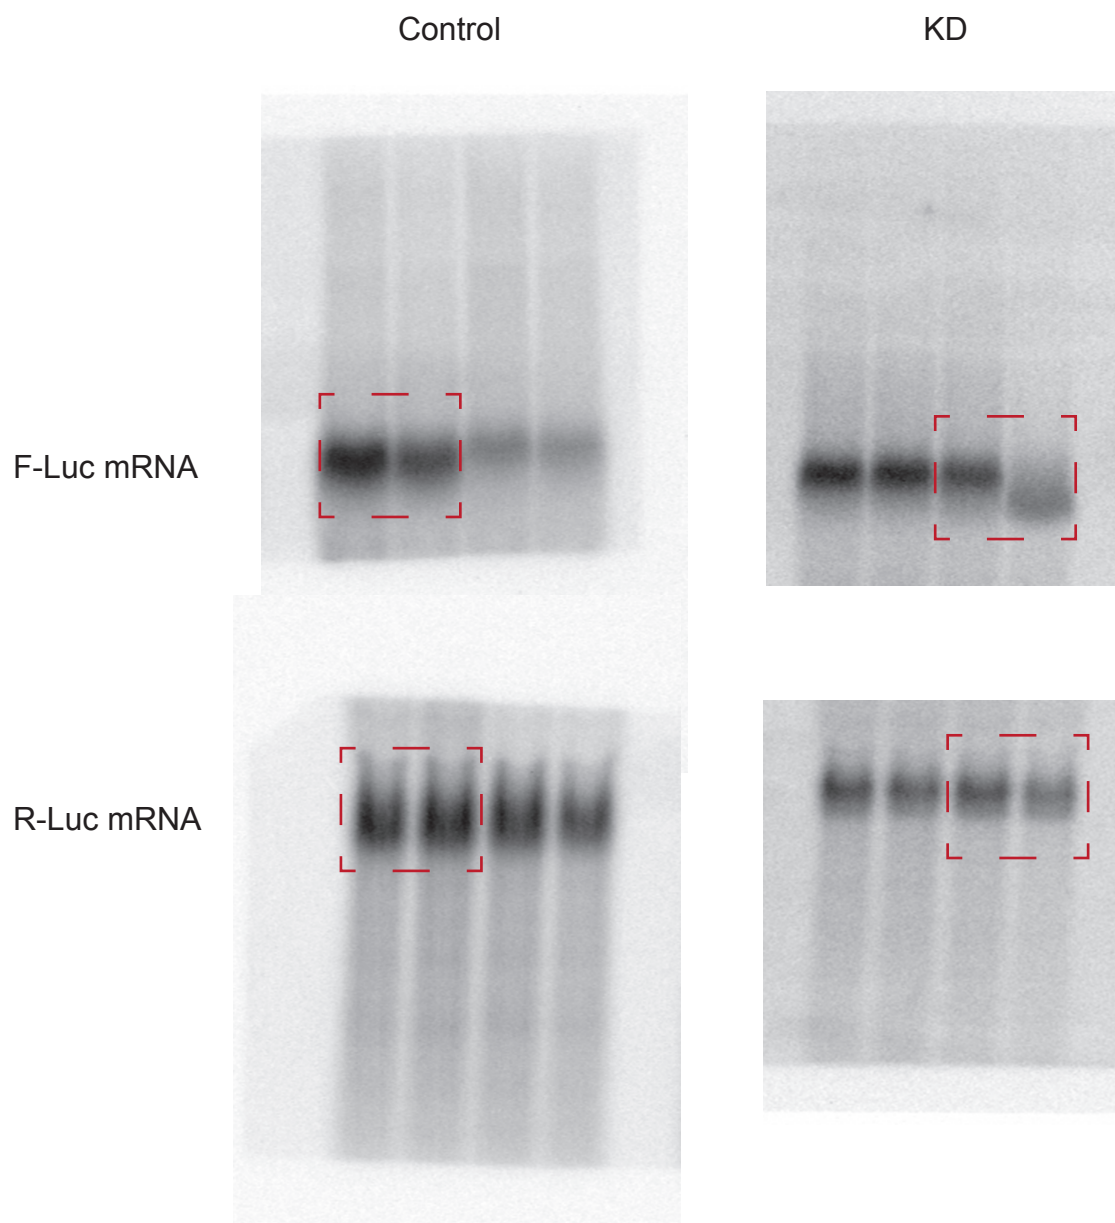

Supplement: emboj201344df4.pdf [file emboj201344df4.pdf]

**Zekri et al.**  
**Figure 5**

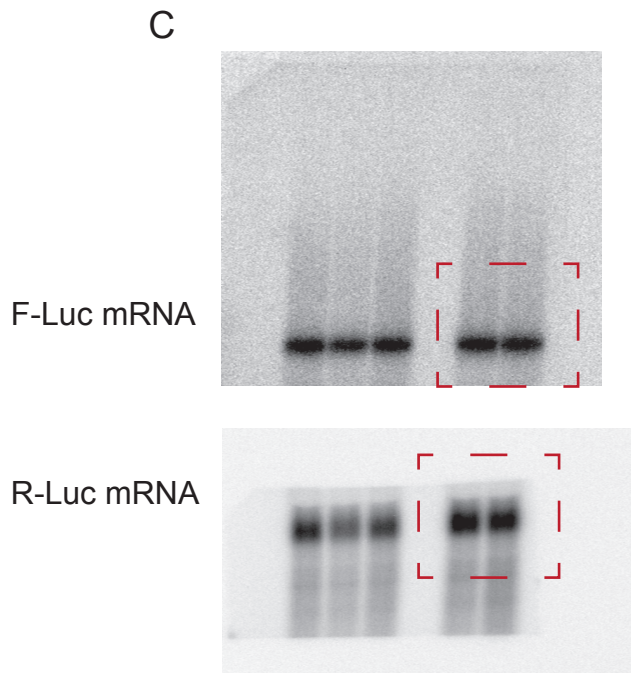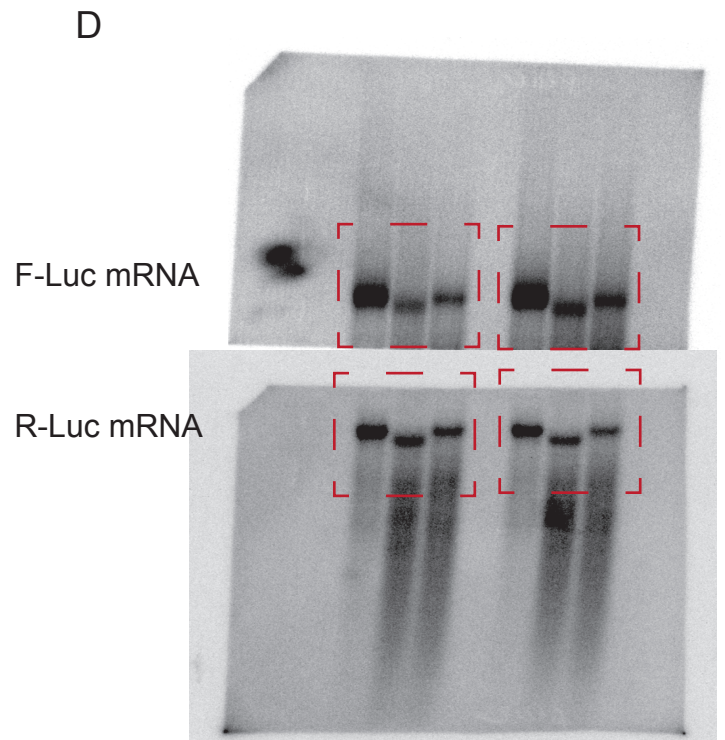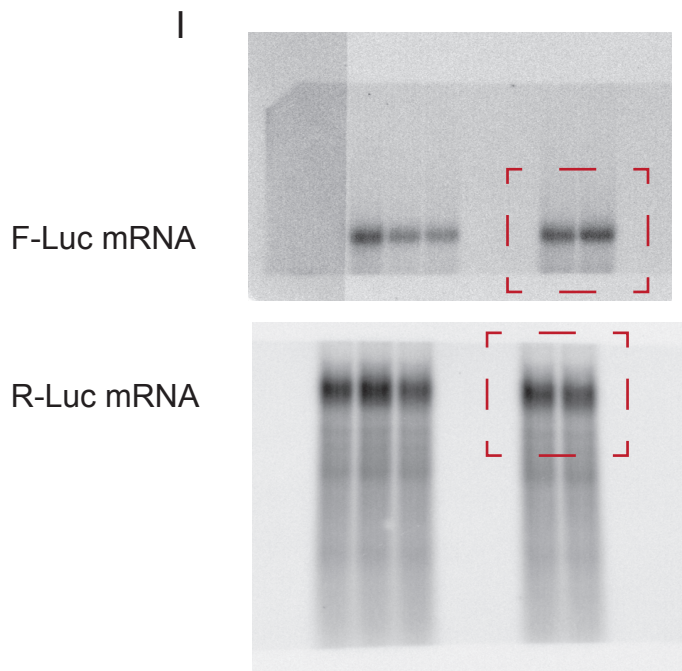

Supplement: emboj201344df5.pdf [file emboj201344df5.pdf]

**Zekri et al.**  
**Figure 6**

**Panels A and B**

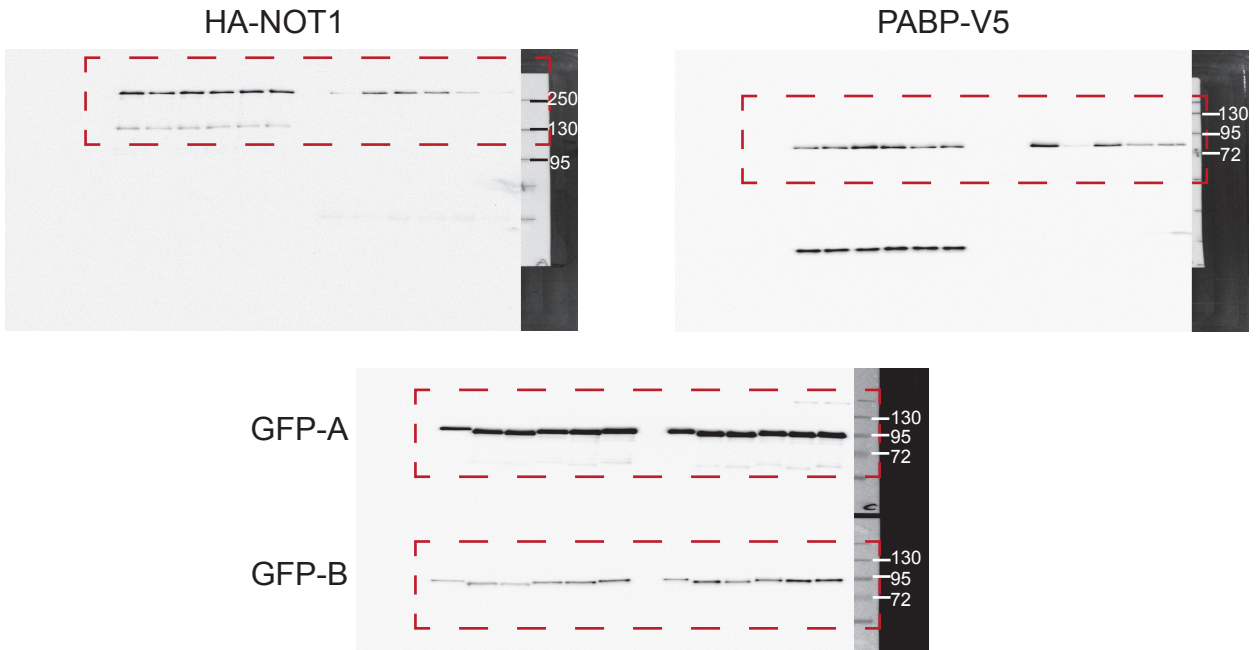

**D**

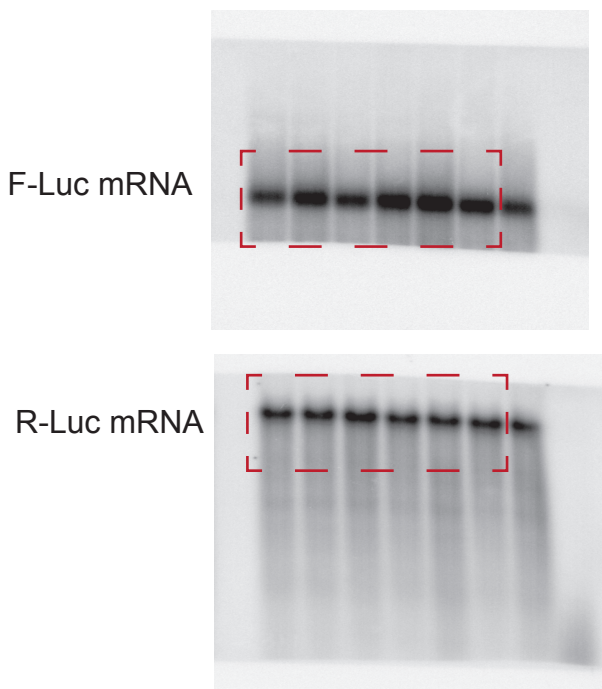

**F**

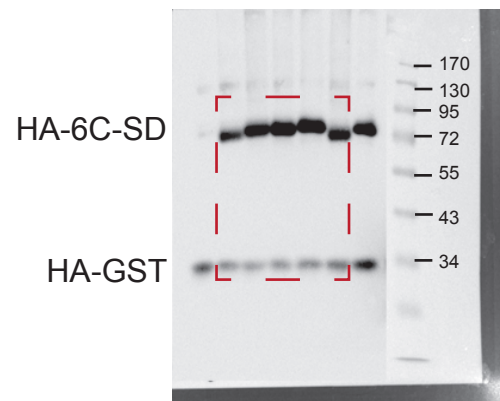

Supplement: emboj201344df6.pdf [file emboj201344df6.pdf]

**Zekri et al.**  
**Figure 7**

Figure 7 B

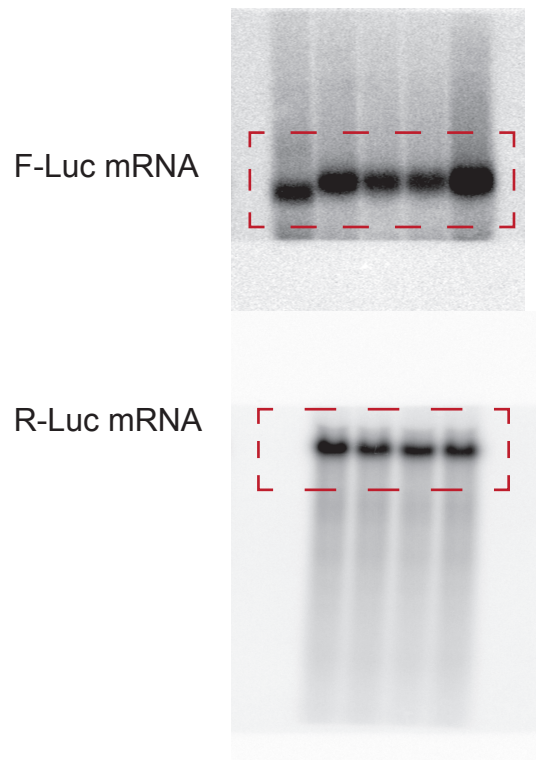

Supplement: emboj201344df7.pdf [file emboj201344df7.pdf]

**Zekri et al.**  
**Figure 8**

**B**

F-Luc mRNA

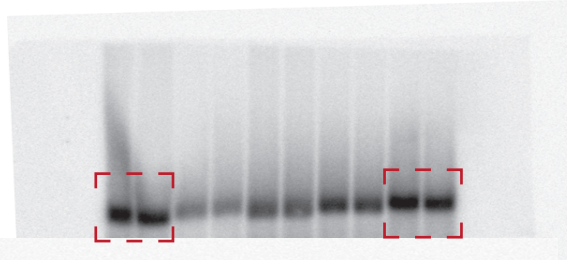

R-Luc mRNA

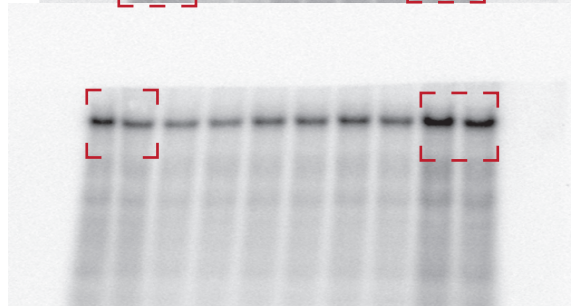

**I**

F-Luc mRNA

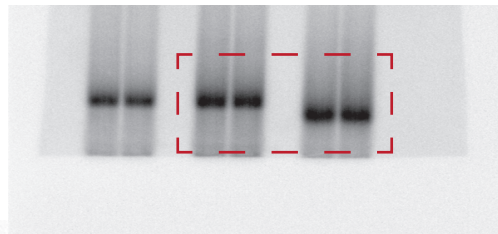

R-Luc mRNA

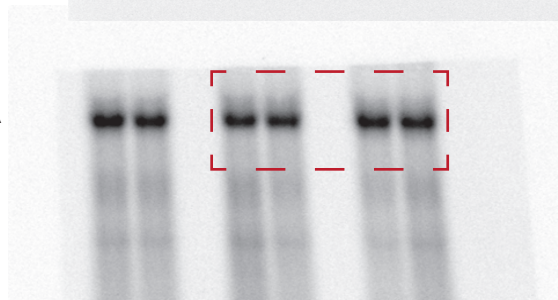

Supplement: emboj201344df8.pdf [file emboj201344df8.pdf]

**Zekri et al.  
Figure 9**

C

F-Luc mRNA

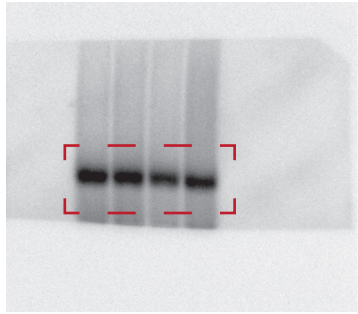

R-Luc mRNA

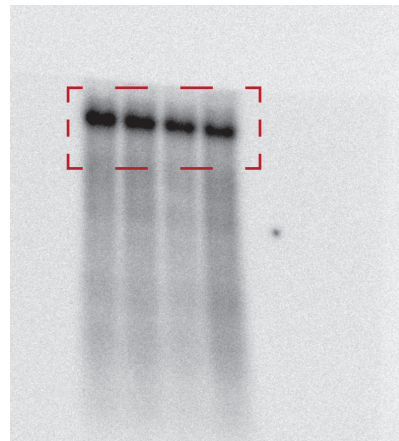

Supplement: emboj201344df9.pdf [file emboj201344df9.pdf]
